# Supplementary figures and images for: Emotional memory impairments in a genetic rat model of depression: involvement of 5-HT/MEK/Arc signaling in restoration
Source: PubMed Central journal article supplement — Mol Psychiatry. 2011 Jan 18;17(2):173–84. doi: 10.1038/mp.2010.131 (PMC3265836; doi:10.1038/mp.2010.131), 2011-01-18

**Passive Avoidance setup**

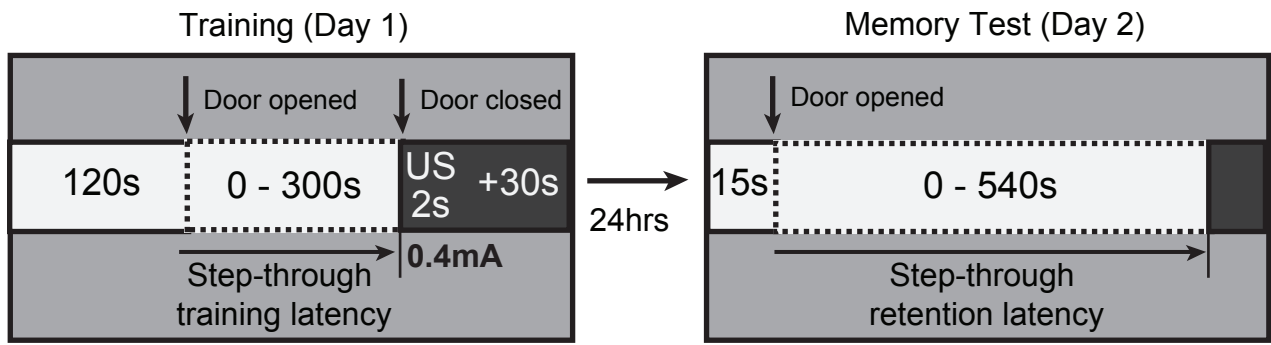

Supplement: mp2010131x3.pdf [file mp2010131x3.pdf]

Fig. S2

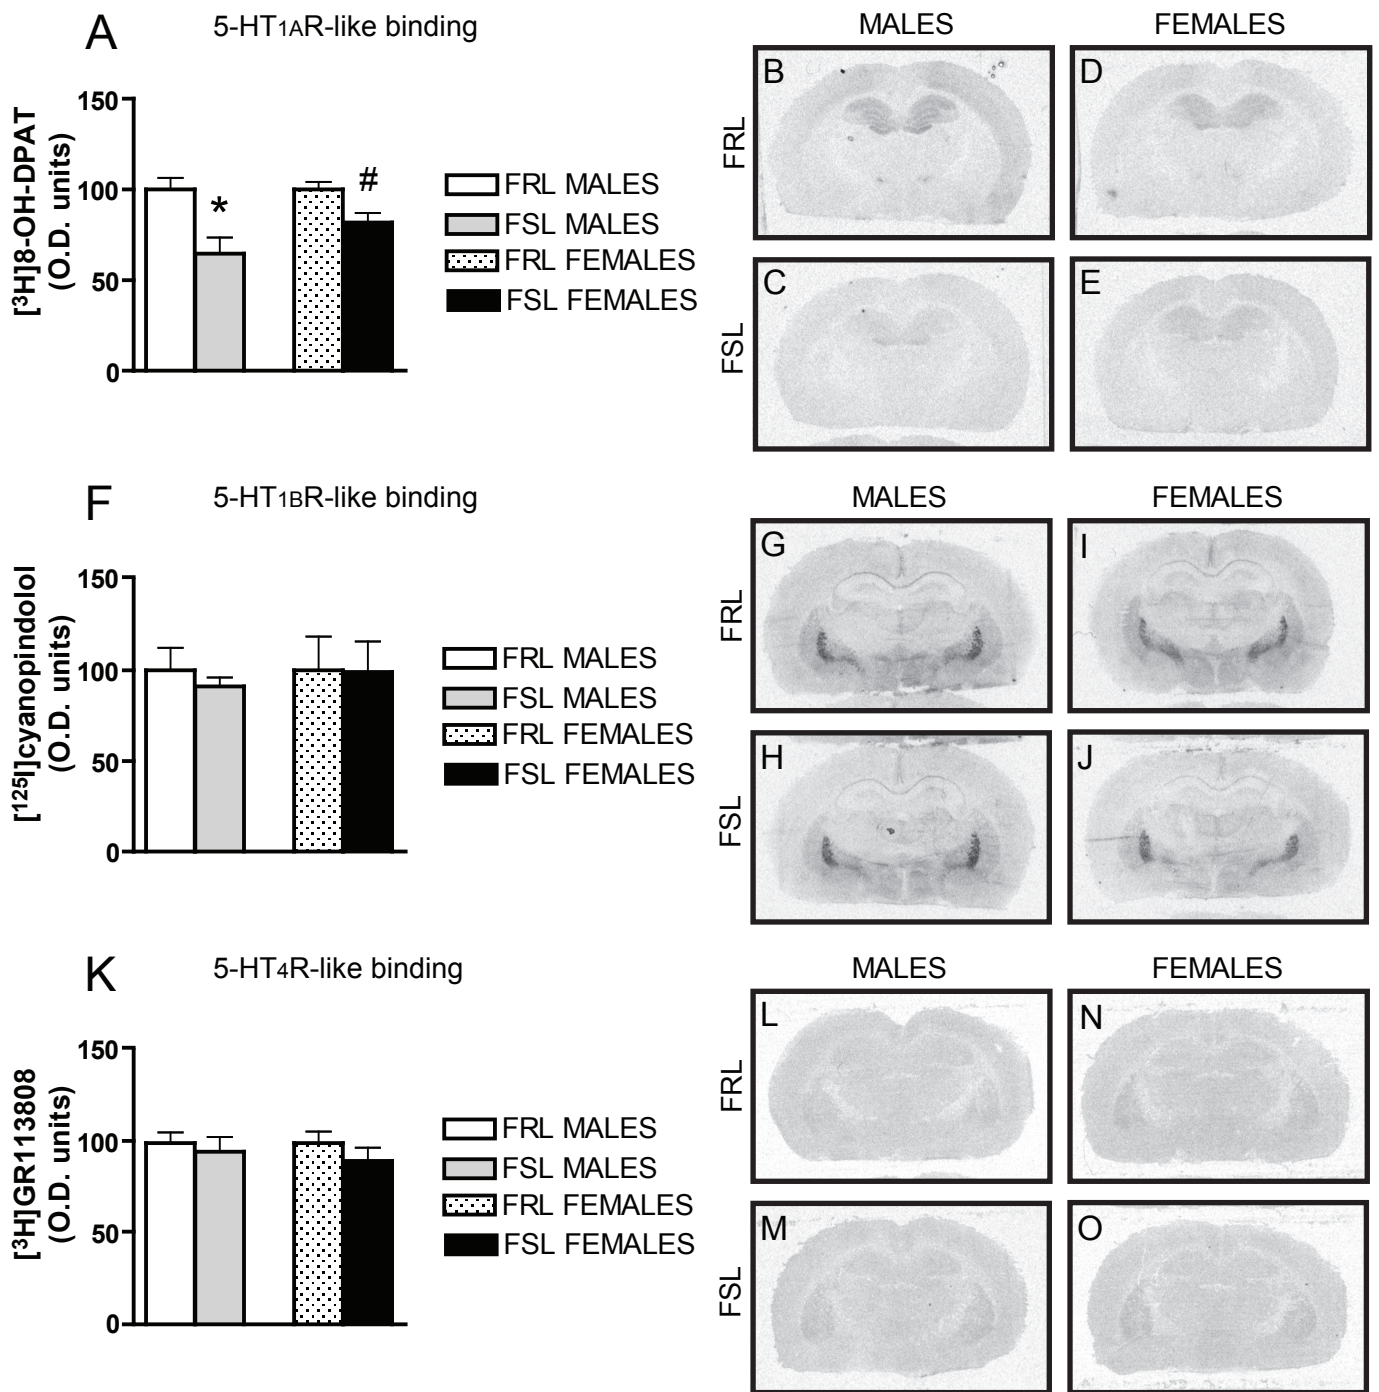

Supplement: mp2010131x4.pdf [file mp2010131x4.pdf]

Fig. S3

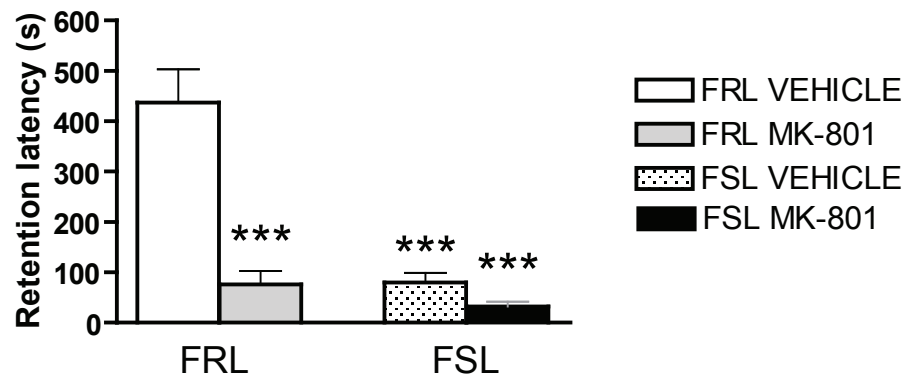

Supplement: mp2010131x5.pdf [file mp2010131x5.pdf]

Fig. S4

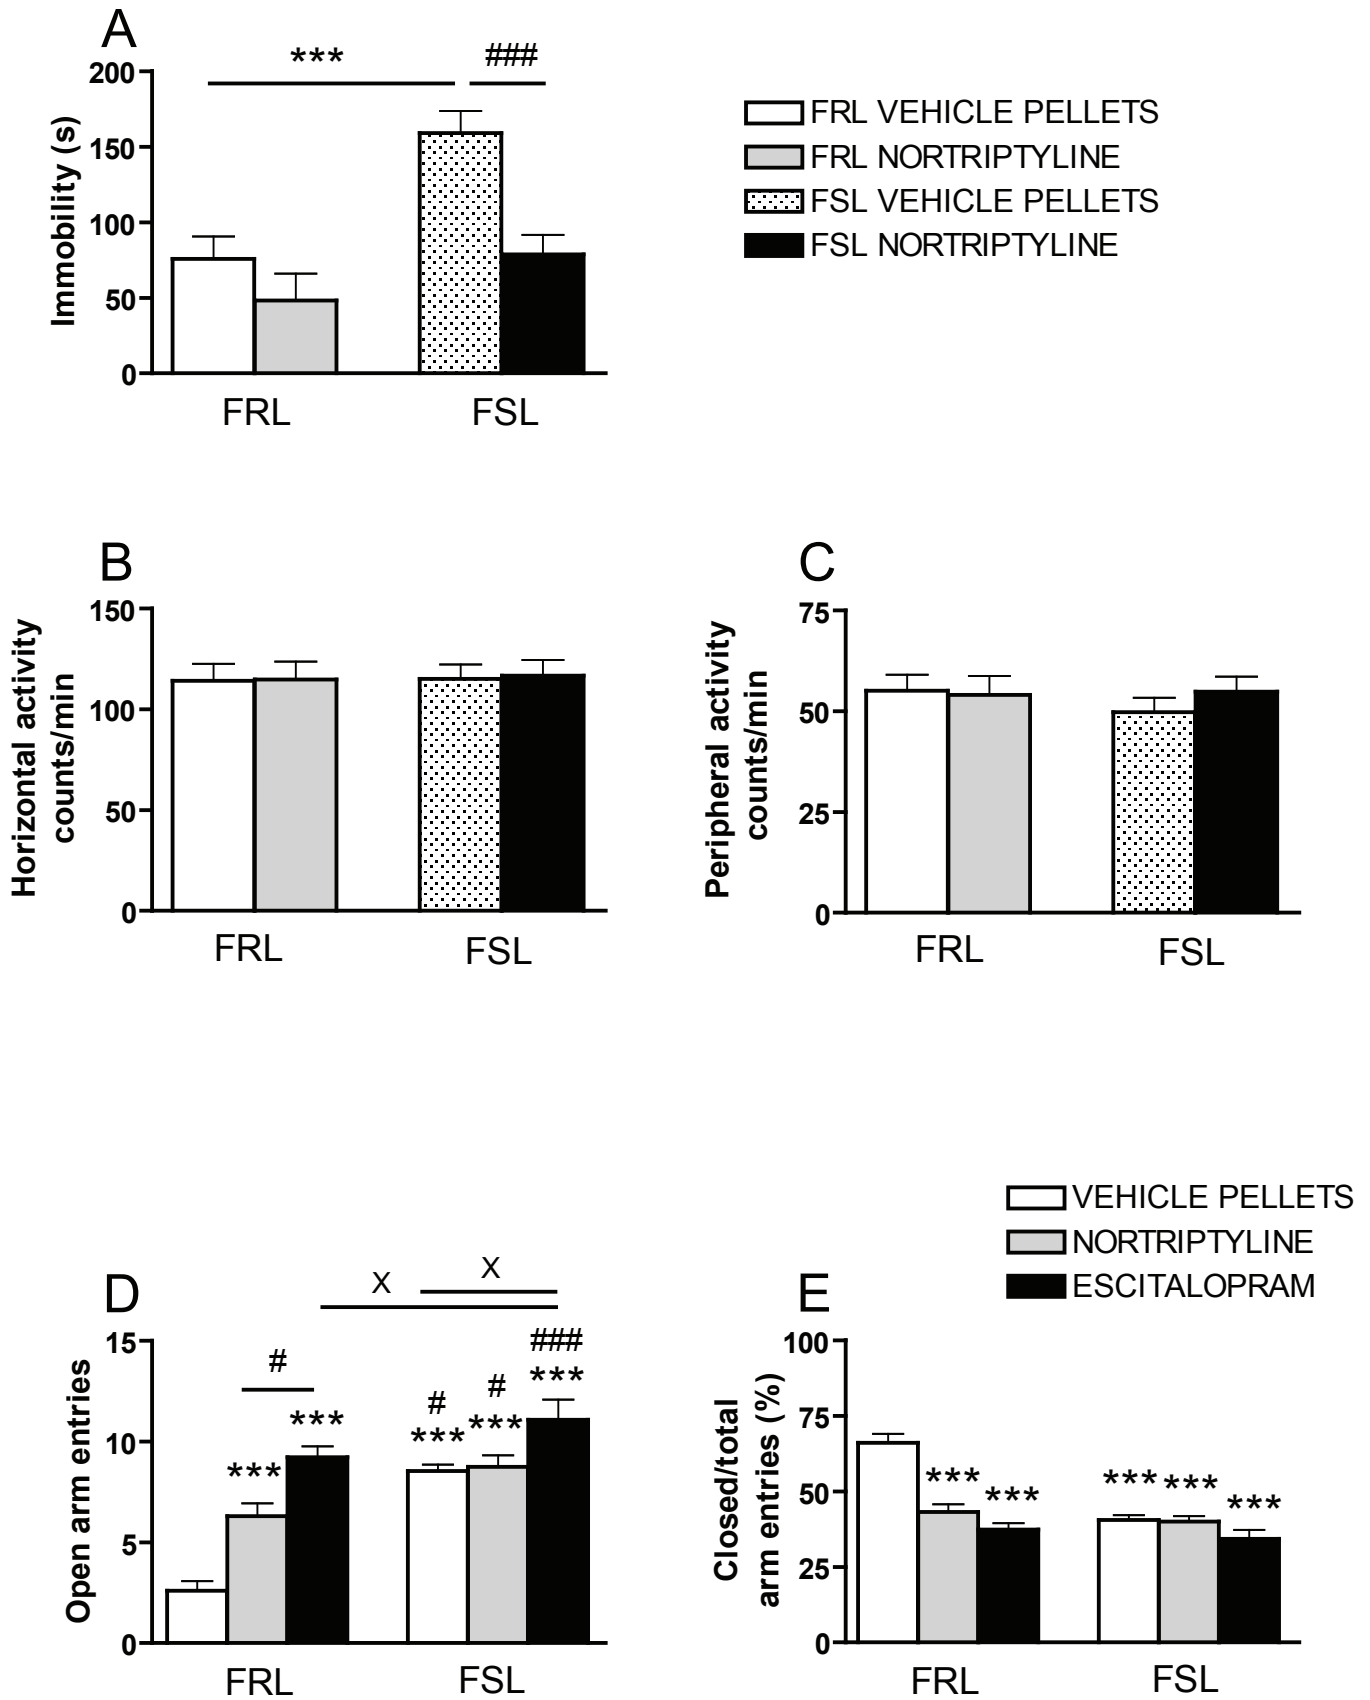

Supplement: mp2010131x6.pdf [file mp2010131x6.pdf]

Fig. S5

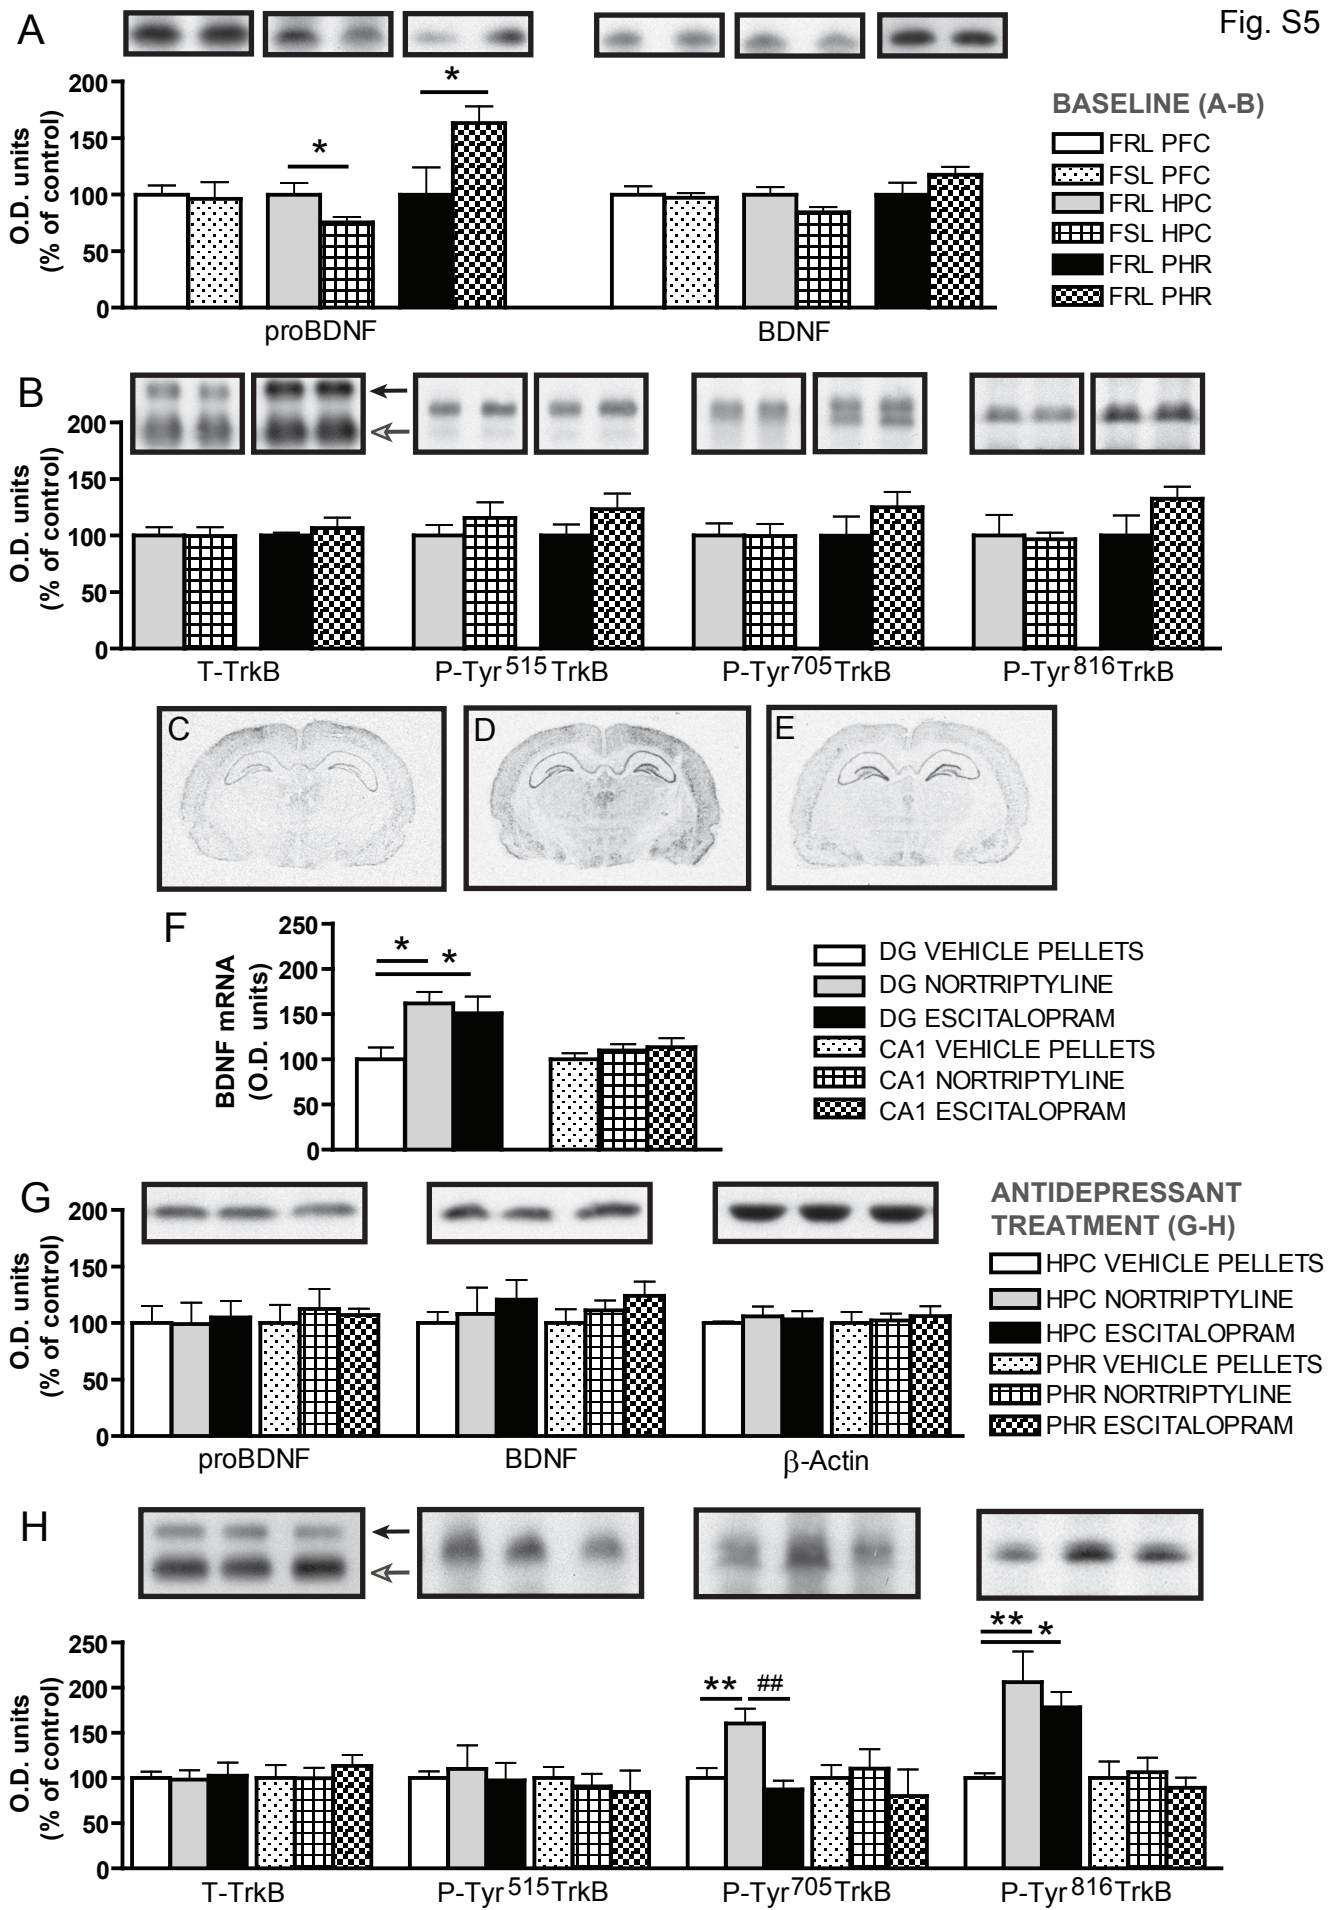

Supplement: mp2010131x7.pdf [file mp2010131x7.pdf]

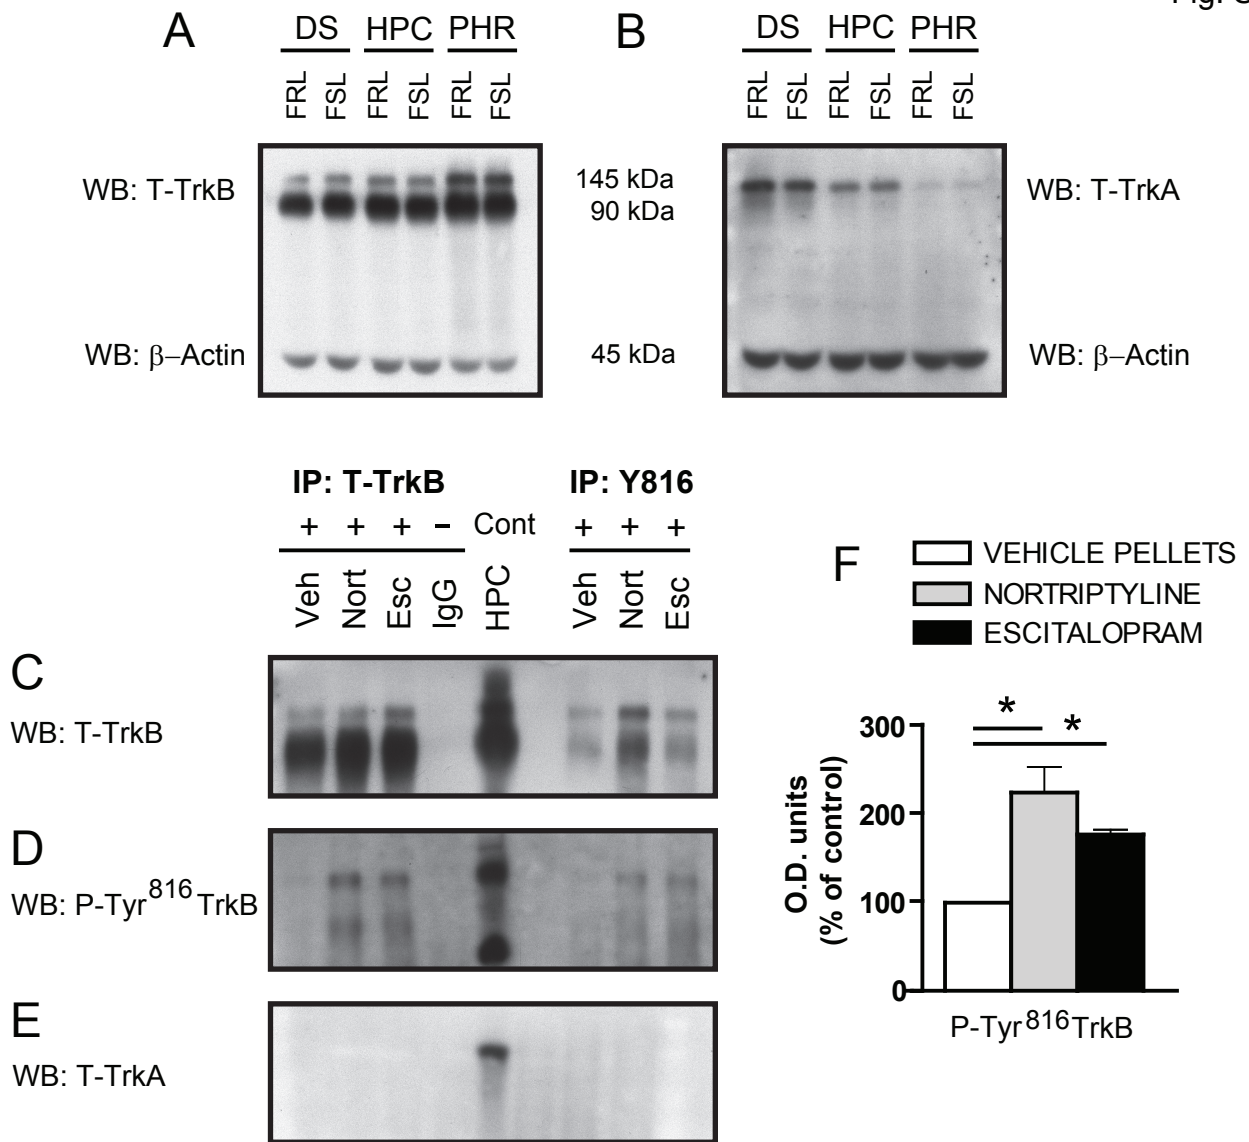

Supplement: mp2010131x8.pdf [file mp2010131x8.pdf]

Fig. S7

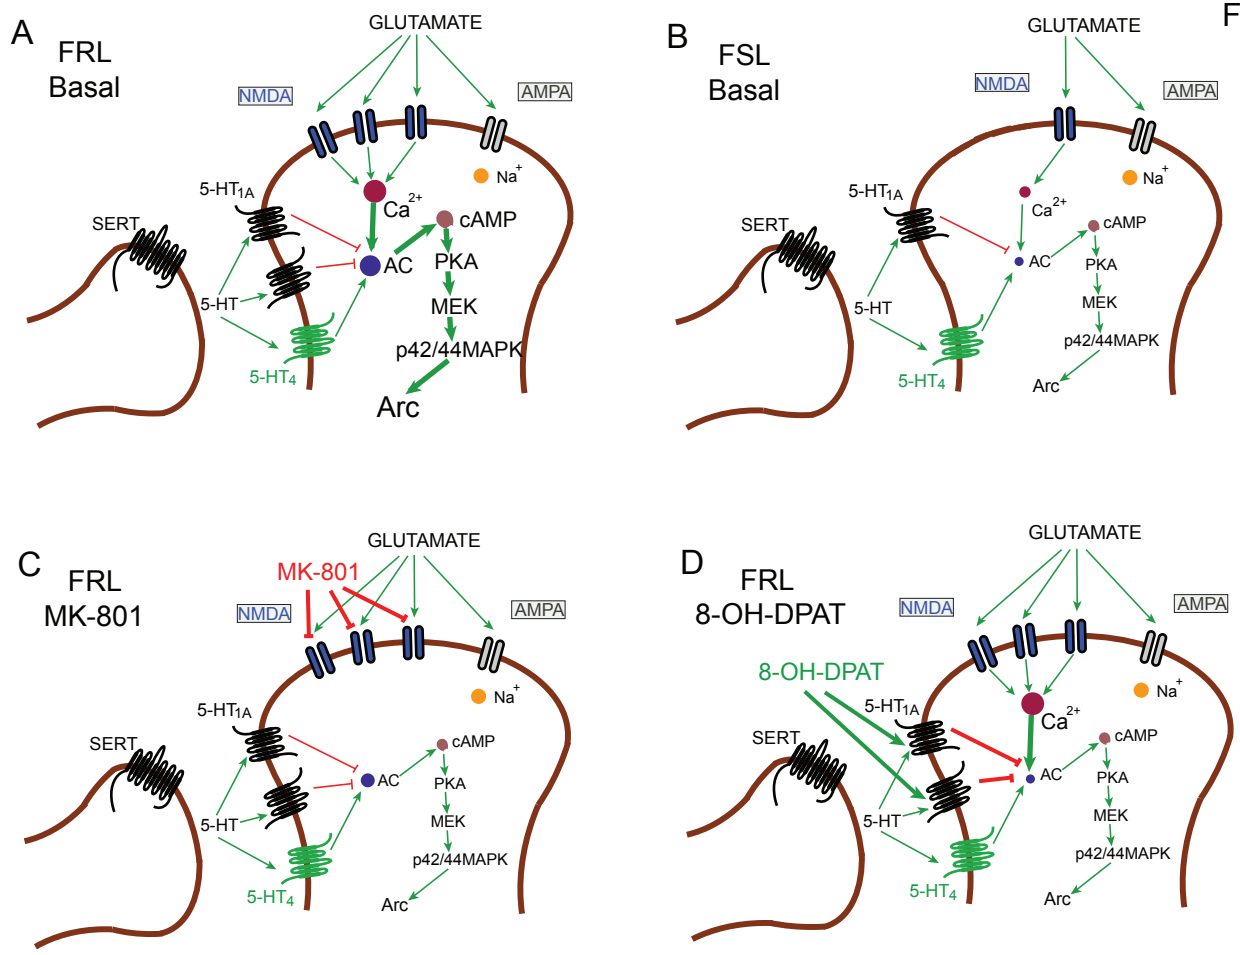

Supplement: mp2010131x9.pdf [file mp2010131x9.pdf]
